# Supplementary material
Source: MDPI journal article supplement (https://www.mdpi.com/1424-8247/16/6/803)
Supplement: s1 [file s1]

## Supplementary Files

**Supplementary Table S1.** Details of the 126 missense mutations, that are identified as deleterious by all the five tools.

| Variant ID   | vf_allele | Alleles | AA  | AA coord | SIFT | PolyPhen | REVEL | MetaLR | Mutation Assessor |
|--------------|-----------|---------|-----|----------|------|----------|-------|--------|-------------------|
| rs1001254325 | C         | T/C     | T/A | 26       | 0    | 0.967    | 0.53  | 0.884  | 0.905             |
| rs538672593  | G         | A/G     | F/S | 30       | 0.01 | 0.781    | 0.5   | 0.839  | 0.879             |
| rs777707092  | T         | C/T     | A/T | 33       | 0.11 | 0.964    | 0.502 | 0.833  | 0.755             |
| rs906946330  | A         | C/A     | G/C | 36       | 0    | 0.696    | 0.797 | 0.846  | 0.931             |
| rs371942576  | A         | G/A     | T/M | 37       | 0    | 0.998    | 0.686 | 0.861  | 0.828             |
| rs1560167771 | C         | T/C     | T/A | 37       | 0.03 | 0.983    | 0.683 | 0.805  | 0.602             |
| rs61749467   | T         | C/T     | V/M | 41       | 0.06 | 0.995    | 0.581 | 0.76   | 0.851             |
| rs1349689376 | G         | A/G     | V/A | 41       | 0    | 0.977    | 0.812 | 0.885  | 0.818             |
| rs754715516  | C         | A/C/G   | L/R | 45       | 0    | 0.999    | 0.951 | 0.926  | 0.991             |
| rs754715516  | G         | A/C/G   | L/P | 45       | 0    | 0.999    | 0.949 | 0.932  | 0.968             |
| rs751010107  | A         | G/A     | T/I | 47       | 0    | 0.999    | 0.772 | 0.914  | 0.977             |
| rs1560167737 | G         | T/G     | T/P | 47       | 0.01 | 0.999    | 0.853 | 0.9    | 0.966             |
| rs567746197  | T         | C/T     | C/Y | 53       | 0    | 1        | 0.716 | 0.851  | 0.805             |
| rs777122848  | T         | C/T     | A/T | 54       | 0    | 0.983    | 0.562 | 0.822  | 0.676             |
| rs1158464387 | A         | G/A     | H/Y | 76       | 0    | 1        | 0.96  | 0.962  | 0.986             |
| rs1560167651 | A         | C/A     | G/V | 77       | 0    | 1        | 0.969 | 0.988  | 0.996             |
| rs747880338  | C         | G/A/C   | F/L | 78       | 0.01 | 0.506    | 0.746 | 0.848  | 0.913             |
| rs150941910  | T         | C/T     | R/K | 79       | 0    | 0.98     | 0.673 | 0.813  | 0.585             |
| rs1176079211 | C         | T/C     | T/A | 81       | 0.01 | 0.755    | 0.563 | 0.816  | 0.794             |
| rs765837711  | G         | A/G     | L/S | 91       | 0    | 0.959    | 0.775 | 0.878  | 0.886             |
| rs1577682011 | T         | A/T     | V/E | 92       | 0.01 | 0.898    | 0.711 | 0.838  | 0.831             |
| rs757899554  | G         | A/G     | L/P | 96       | 0    | 0.995    | 0.789 | 0.907  | 0.989             |
| rs764563463  | A         | T/A     | D/V | 100      | 0    | 0.989    | 0.835 | 0.922  | 0.988             |
| rs267607219  | G         | A/G     | W/R | 108      | 0    | 1        | 0.952 | 0.932  | 0.995             |
| rs1449651719 | G         | T/G     | N/H | 109      | 0    | 0.997    | 0.823 | 0.829  | 0.735             |
| rs370653261  | A         | C/A/T   | R/L | 110      | 0    | 0.943    | 0.587 | 0.832  | 0.822             |
| rs1173584831 | T         | C/T     | A/T | 112      | 0    | 0.999    | 0.882 | 0.908  | 0.919             |
| rs1256399071 | A         | G/A     | T/I | 113      | 0    | 0.952    | 0.683 | 0.82   | 0.631             |
| rs199508534  | A         | G/A     | T/I | 114      | 0    | 0.984    | 0.529 | 0.84   | 0.773             |
| rs1269981216 | T         | C/T     | A/T | 120      | 0    | 0.982    | 0.716 | 0.922  | 0.92              |
| rs201061198  | G         | A/G     | S/P | 121      | 0.02 | 0.555    | 0.545 | 0.83   | 0.914             |
| rs762974986  | T         | C/T     | A/T | 128      | 0    | 0.994    | 0.786 | 0.887  | 0.902             |
| rs1577681837 | A         | C/A     | L/F | 131      | 0    | 0.998    | 0.833 | 0.867  | 0.896             |
| rs768489997  | G         | A/G     | I/T | 135      | 0    | 0.987    | 0.947 | 0.878  | 0.856             |
| rs1369025550 | G         | C/G     | D/H | 136      | 0.06 | 0.928    | 0.62  | 0.867  | 0.763             |

|              |   |       |     |     |      |       |       |       |       |
|--------------|---|-------|-----|-----|------|-------|-------|-------|-------|
| rs1553824000 | T | C/T   | G/E | 142 | 0    | 0.999 | 0.729 | 0.901 | 0.921 |
| rs770550405  | C | T/C   | Y/C | 149 | 0    | 0.986 | 0.846 | 0.872 | 0.936 |
| rs770313843  | T | C/T   | G/R | 152 | 0    | 1     | 0.984 | 0.995 | 0.996 |
| rs748606060  | C | G/C   | L/V | 155 | 0    | 1     | 0.918 | 0.907 | 0.916 |
| rs1368717012 | G | C/G   | G/A | 156 | 0.02 | 0.996 | 0.962 | 0.997 | 0.949 |
| rs1217158658 | T | C/T   | G/R | 164 | 0    | 1     | 0.973 | 0.978 | 0.994 |
| rs765279202  | T | G/T   | L/M | 171 | 0    | 0.887 | 0.588 | 0.896 | 0.892 |
| rs762002438  | A | C/A   | R/I | 173 | 0    | 0.998 | 0.952 | 0.972 | 0.993 |
| rs1320917299 | T | C/T   | G/S | 176 | 0.02 | 0.998 | 0.887 | 0.93  | 0.942 |
| rs1484869809 | G | C/G   | D/H | 178 | 0    | 1     | 0.968 | 0.974 | 0.996 |
| rs766041291  | A | G/A/C | P/S | 179 | 0    | 1     | 0.973 | 0.956 | 0.987 |
| rs766041291  | C | G/A/C | P/A | 179 | 0.02 | 1     | 0.926 | 0.909 | 0.861 |
| rs138900382  | C | G/C   | A/G | 180 | 0    | 1     | 0.938 | 0.941 | 0.979 |
| rs536408544  | T | C/T   | A/T | 180 | 0    | 1     | 0.961 | 0.918 | 0.935 |
| rs1185160123 | T | C/T   | G/D | 181 | 0    | 1     | 0.905 | 0.875 | 0.908 |
| rs1008933418 | A | G/A   | P/S | 182 | 0    | 1     | 0.915 | 0.914 | 0.97  |
| rs1251506312 | A | G/A   | P/L | 182 | 0    | 1     | 0.891 | 0.892 | 0.898 |
| rs769118659  | T | C/T   | R/K | 192 | 0.01 | 0.98  | 0.901 | 0.876 | 0.8   |
| rs747561558  | C | T/C   | D/G | 194 | 0.01 | 0.996 | 0.897 | 0.891 | 0.919 |
| rs746244349  | G | T/G   | Q/P | 199 | 0    | 0.956 | 0.834 | 0.833 | 0.879 |
| rs1433834243 | C | A/C   | F/L | 200 | 0.01 | 0.914 | 0.934 | 0.929 | 0.824 |
| rs778994315  | C | T/C   | D/G | 202 | 0    | 0.999 | 0.965 | 0.948 | 0.992 |
| rs1355676735 | T | C/T   | D/N | 202 | 0    | 0.999 | 0.902 | 0.952 | 0.98  |
| rs372971860  | T | C/T   | V/I | 203 | 0.04 | 0.951 | 0.617 | 0.832 | 0.662 |
| rs778051082  | C | T/C   | H/R | 205 | 0    | 1     | 0.977 | 0.972 | 0.995 |
| rs565980022  | A | G/A   | H/Y | 205 | 0    | 1     | 0.974 | 0.961 | 0.932 |
| rs1560163575 | G | A/G   | S/P | 206 | 0    | 0.985 | 0.875 | 0.878 | 0.949 |
| rs756287038  | G | C/A/G | D/H | 207 | 0    | 0.999 | 0.944 | 0.914 | 0.935 |
| rs756287038  | A | C/A/G | D/Y | 207 | 0    | 0.999 | 0.911 | 0.892 | 0.808 |
| rs1315409277 | G | A/G   | L/P | 211 | 0    | 0.994 | 0.945 | 0.918 | 0.97  |
| rs369104457  | G | A/G   | L/S | 217 | 0    | 0.893 | 0.715 | 0.818 | 0.682 |
| rs1287841272 | T | C/T   | G/R | 218 | 0    | 1     | 0.966 | 0.955 | 0.995 |
| rs866749761  | T | C/G/T | G/E | 218 | 0    | 1     | 0.956 | 0.955 | 0.995 |
| rs866749761  | G | C/G/T | G/A | 218 | 0    | 1     | 0.893 | 0.903 | 0.798 |
| rs760042144  | G | A/G   | I/T | 220 | 0    | 0.994 | 0.869 | 0.825 | 0.758 |
| rs371437625  | G | A/G   | Y/H | 223 | 0    | 0.999 | 0.946 | 0.932 | 0.983 |
| rs1453368208 | A | G/A   | P/L | 224 | 0    | 0.997 | 0.839 | 0.898 | 0.904 |
| rs760141096  | A | T/A   | N/I | 225 | 0    | 1     | 0.901 | 0.951 | 0.996 |
| rs771383305  | T | C/T   | G/E | 226 | 0    | 0.999 | 0.966 | 0.977 | 0.977 |
| rs1405858753 | C | T/C   | D/G | 229 | 0.01 | 0.793 | 0.887 | 0.825 | 0.683 |
| rs1177415706 | C | G/C   | P/R | 231 | 0    | 1     | 0.95  | 0.973 | 0.936 |

|              |   |       |     |     |      |       |       |       |       |
|--------------|---|-------|-----|-----|------|-------|-------|-------|-------|
| rs1560161495 | T | C/T   | G/R | 240 | 0.01 | 0.997 | 0.892 | 0.921 | 0.905 |
| rs763397105  | C | T/C   | Y/C | 243 | 0    | 0.997 | 0.86  | 0.872 | 0.904 |
| rs201249971  | T | A/T   | C/S | 246 | 0    | 1     | 0.956 | 0.617 | 0.986 |
| rs201868115  | T | G/T   | H/N | 248 | 0    | 0.994 | 0.924 | 0.942 | 0.995 |
| rs762143873  | A | C/A/T | R/M | 250 | 0.04 | 0.633 | 0.691 | 0.901 | 0.798 |
| rs141948236  | A | G/A   | S/F | 251 | 0    | 0.992 | 0.95  | 0.934 | 0.982 |
| rs960010245  | G | C/G/T | V/L | 252 | 0    | 0.588 | 0.509 | 0.762 | 0.685 |
| rs1284573868 | T | A/T   | Y/N | 255 | 0    | 0.981 | 0.933 | 0.925 | 0.976 |
| rs768740653  | G | T/G   | Y/S | 255 | 0    | 0.962 | 0.905 | 0.913 | 0.976 |
| rs1445790092 | G | A/G   | S/P | 258 | 0    | 0.994 | 0.913 | 0.945 | 0.981 |
| rs770909511  | G | A/G   | L/P | 259 | 0    | 0.995 | 0.94  | 0.593 | 0.951 |
| rs755886556  | T | G/A/T | A/E | 267 | 0    | 0.918 | 0.723 | 0.635 | 0.961 |
| rs780714833  | C | A/C   | Y/D | 268 | 0    | 0.985 | 0.694 | 0.886 | 0.927 |
| rs1031272901 | A | G/A   | P/S | 269 | 0.02 | 0.946 | 0.789 | 0.859 | 0.712 |
| rs1208678501 | T | C/T   | C/Y | 270 | 0    | 0.99  | 0.898 | 0.713 | 0.994 |
| rs1274322632 | A | G/A   | S/F | 272 | 0    | 0.997 | 0.911 | 0.912 | 0.955 |
| rs754454368  | C | T/C   | Y/C | 276 | 0    | 0.992 | 0.827 | 0.91  | 0.965 |
| rs1235968992 | T | C/T   | G/D | 279 | 0    | 0.994 | 0.872 | 0.87  | 0.832 |
| rs1410541813 | G | C/G   | C/S | 281 | 0    | 0.999 | 0.969 | 0.596 | 0.952 |
| rs770837697  | A | G/A   | P/S | 293 | 0    | 1     | 0.82  | 0.834 | 0.662 |
| rs141115870  | G | C/G   | G/R | 296 | 0    | 0.997 | 0.97  | 0.979 | 0.977 |
| rs769679909  | C | T/C   | Y/C | 297 | 0    | 0.992 | 0.688 | 0.898 | 0.95  |
| rs776331827  | G | T/C/G | D/A | 300 | 0.09 | 0.542 | 0.635 | 0.875 | 0.86  |
| rs776331827  | C | T/C/G | D/G | 300 | 0.06 | 0.719 | 0.643 | 0.857 | 0.848 |
| rs879101399  | A | C/A   | W/L | 302 | 0    | 0.964 | 0.741 | 0.788 | 0.738 |
| rs950306164  | G | A/G   | L/P | 306 | 0    | 0.995 | 0.609 | 0.803 | 0.753 |
| rs1273377485 | G | C/G   | A/P | 321 | 0.08 | 0.936 | 0.515 | 0.816 | 0.755 |
| rs757769060  | T | G/T   | P/Q | 325 | 0    | 0.998 | 0.9   | 0.971 | 0.988 |
| rs1433870719 | G | A/G   | I/T | 335 | 0.02 | 0.641 | 0.62  | 0.761 | 0.808 |
| rs1265005542 | T | C/T   | G/R | 345 | 0    | 0.997 | 0.798 | 0.842 | 0.856 |
| rs1157940221 | C | G/C   | S/C | 361 | 0.04 | 0.928 | 0.67  | 0.787 | 0.792 |
| rs768835064  | C | T/C   | Y/C | 373 | 0    | 0.96  | 0.721 | 0.795 | 0.832 |
| rs533334084  | A | G/A   | L/F | 379 | 0.06 | 0.908 | 0.633 | 0.805 | 0.862 |
| rs878908043  | A | C/A   | L/F | 394 | 0.02 | 0.951 | 0.52  | 0.743 | 0.832 |
| rs781204756  | T | A/T   | F/I | 396 | 0.12 | 0.566 | 0.606 | 0.75  | 0.528 |
| rs145905764  | A | G/A   | T/I | 398 | 0    | 0.786 | 0.619 | 0.758 | 0.828 |
| rs1391731106 | A | T/A   | R/W | 416 | 0.02 | 0.924 | 0.633 | 0.75  | 0.758 |
| rs373209531  | A | G/A   | P/L | 421 | 0.01 | 0.815 | 0.556 | 0.755 | 0.828 |
| rs146753303  | A | G/A   | R/W | 428 | 0.02 | 0.998 | 0.694 | 0.818 | 0.853 |
| rs764473746  | G | C/G/T | R/P | 428 | 0    | 0.995 | 0.848 | 0.838 | 0.853 |
| rs764473746  | T | C/G/T | R/Q | 428 | 0.01 | 0.975 | 0.552 | 0.81  | 0.853 |

|              |   |         |     |     |      |       |       |       |       |
|--------------|---|---------|-----|-----|------|-------|-------|-------|-------|
| rs775881352  | T | A/G/T   | D/E | 430 | 0    | 0.983 | 0.573 | 0.743 | 0.847 |
| rs1219851021 | G | A/G     | V/A | 432 | 0    | 0.692 | 0.611 | 0.732 | 0.808 |
| rs759994648  | A | C/A/G/T | V/F | 432 | 0    | 0.938 | 0.672 | 0.806 | 0.808 |
| rs376062316  | T | C/G/T   | E/K | 435 | 0.05 | 0.967 | 0.803 | 0.818 | 0.856 |
| rs376062316  | G | C/G/T   | E/Q | 435 | 0.02 | 0.882 | 0.658 | 0.845 | 0.772 |
| rs1040056355 | A | T/A     | N/I | 436 | 0    | 0.923 | 0.59  | 0.769 | 0.832 |
| rs1427644457 | A | T/A/C   | I/F | 444 | 0.02 | 0.851 | 0.563 | 0.792 | 0.812 |
| rs779862632  | G | C/G     | C/S | 446 | 0    | 1     | 0.819 | 0.834 | 0.862 |
